# Supplementary material
Source: PubMed Central journal article supplement (PMC3183981)
Supplement: 11-7510_z7g999112008s1.pdf [file 11-7510_z7g999112008s1.pdf]

Supplementary Table S1. Genes previously associated with T2D, DR and DN on IBC chip

| Gene           | Number of SNPs in Locus on IBC Chip | Previously Associated Phenotype |
|----------------|-------------------------------------|---------------------------------|
| <i>ACE</i>     | 66                                  | DN                              |
| <i>ADAMTS9</i> | 2                                   | T2D                             |
| <i>ADIPOQ</i>  | 23                                  | DN                              |
| <i>ADRB3</i>   | 25                                  | DR                              |
| <i>AGER</i>    | 30                                  | DN                              |
| <i>AKR1B1</i>  | 24                                  | DN, DR                          |
| <i>APOE</i>    | 21                                  | DN                              |
| <i>CCR5</i>    | 1                                   | DN                              |
| <i>CDKALI</i>  | 373                                 | T2D                             |
| <i>CDKN2B</i>  | 13                                  | T2D                             |
| <i>CNDP1</i>   | 3                                   | DN                              |
| <i>CTGF</i>    | 14                                  | DN                              |
| <i>EPO</i>     | 14                                  | DR, DN                          |
| <i>FABP2</i>   | 9                                   | DN                              |
| <i>FTO</i>     | 325                                 | T2D                             |
| <i>HFE</i>     | 9                                   | DR                              |
| <i>HHEX</i>    | 9                                   | T2D                             |
| <i>ICAM1</i>   | 35                                  | DR                              |
| <i>IGF2BP2</i> | 2                                   | T2D                             |
| <i>IGFBP1</i>  | 2                                   | DN                              |
| <i>IL6R</i>    | 46                                  | DN                              |
| <i>ITGA2</i>   | 152                                 | DR                              |
| <i>KCNJ11</i>  | 13                                  | T2D                             |
| <i>NFKBIA</i>  | 41                                  | DN                              |
| <i>NOS3</i>    | 55                                  | DN                              |
| <i>NPHS1</i>   | 19                                  | DN                              |
| <i>PPARG</i>   | 114                                 | T2D                             |
| <i>PRKCB1</i>  | 141                                 | DN                              |
| <i>REN</i>     | 59                                  | DN                              |
| <i>RENBP</i>   | 10                                  | DN                              |
| <i>SELP</i>    | 45                                  | DN                              |
| <i>SLC30A8</i> | 18                                  | T2D                             |
| <i>TCF2</i>    | 1                                   | T2D                             |
| <i>TCF7L2</i>  | 115                                 | T2D, DN                         |
| <i>TGFBR2</i>  | 88                                  | DN                              |
| <i>TGFBR3</i>  | 74                                  | DN                              |
| <i>TNF</i>     | 9                                   | DN                              |
| <i>VEGFA</i>   | 10                                  | DR, DN                          |
| <i>WFS1</i>    | 39                                  | T2D                             |

IBC= ITMAT-Broad-CARe, T2D=Type 2 diabetes, DR=diabetic retinopathy, DN=diabetic nephropathy

Supplementary Table S2. Fundus Photography Protocols for Replication Cohorts.

| Cohort     | Number of Eyes Photographed per Participant | Number of Fields Photographed per Eye | Size of Each Field Photographed |
|------------|---------------------------------------------|---------------------------------------|---------------------------------|
| AGES       | Two                                         | Two                                   | 45 degrees                      |
| BMES       | Two                                         | Five                                  | 30 degrees                      |
| Go-DARTS*  | Two                                         | Two                                   | 45 degrees                      |
| FIND-Eye   | Two                                         | Seven                                 | 30 degrees                      |
| FinnDiane† | Two                                         | Two                                   | 45 degrees                      |
| Lublin     | Two                                         | Three                                 | 45 degrees                      |
| SiMES      | Two                                         | Two                                   | 45 degrees                      |
| SP2        | Two                                         | Two                                   | 45 degrees                      |

\*Go-DARTS determined DR phenotype for cases based on three data sources: a national retinal screening program, a regional retinal screening service and a validation database. They determined DR phenotype for controls from 19 different sources, including retinal screening services and diabetes clinics. Only the national and regional retinal screening patients had fundus photographs taken per this specified protocol.

†The FinnDiane sample includes some participants that were phenotyped by review of patient records.

Supplementary Table S3. Haplotype Association Results

(A) *SELP* (ETDRS grade  $\geq 14$  case definition)

| Haplotype 1:rs6663533 rs2227245 rs9332533 rs6019 rs6691048 rs2213873 rs16862377 rs12755775 rs6703462 rs6664922 rs3753305 rs3917854 rs6128 rs6136 rs6133 rs6127 rs3766122 rs3917793 rs760694 rs3917779 rs3917768 |                    |                       |            |         |
|-----------------------------------------------------------------------------------------------------------------------------------------------------------------------------------------------------------------|--------------------|-----------------------|------------|---------|
| Haplotype                                                                                                                                                                                                       | Frequency in Cases | Frequency in Controls | Chi Square | p value |
| TTCCTAAGGCGTCTTCGGG                                                                                                                                                                                             | 0.18               | 0.17                  | 0.43       | 0.51    |
| TCTCCGAGGCCCTCCTCTGT                                                                                                                                                                                            | 0.36               | 0.33                  | 0.75       | 0.39    |
| TCTCCGAAGCCCCTCCTCTGT                                                                                                                                                                                           | 0.12               | 0.11                  | 0.08       | 0.78    |
| TCTCCGCGTGGCCTTTATGG                                                                                                                                                                                            | 0.11               | 0.10                  | 0.12       | 0.73    |
| TTCCTAAGGCGTCGCTTCGGG                                                                                                                                                                                           | 0.12               | 0.11                  | 0.22       | 0.64    |
| TTCCTAAGGCCTCCTCTGT                                                                                                                                                                                             | 0.004              | 0.02                  | 2.59       | 0.11    |
| TCTCCGAGGCGCTTCTCCGGG                                                                                                                                                                                           | 0.04               | 0.05                  | 0.32       | 0.57    |
| GCTGCGAGGCGTTATTCGAT                                                                                                                                                                                            | 0.02               | 0.05                  | 4.58       | 0.03    |
| TCTCCGAGGCGCCTTTATGG                                                                                                                                                                                            | 0.01               | 0.01                  | 0.38       | 0.54    |
| TCTCCGAGGCGCTTATTCGAT                                                                                                                                                                                           | 0.04               | 0.06                  | 1.67       | 0.20    |
| Haplotype 2: rs2235302 rs3917731 rs6131 rs6125 rs3917707 rs2244526                                                                                                                                              |                    |                       |            |         |
| CTCCAC                                                                                                                                                                                                          | 0.09               | 0.09                  | 0.02       | 0.89    |
| TTTTCT                                                                                                                                                                                                          | 0.04               | 0.06                  | 1.33       | 0.25    |
| TTTCAT                                                                                                                                                                                                          | 0.11               | 0.15                  | 3.38       | 0.07    |
| TCCCAT                                                                                                                                                                                                          | 0.30               | 0.28                  | 0.70       | 0.40    |
| CTCCAT                                                                                                                                                                                                          | 0.46               | 0.42                  | 1.31       | 0.25    |

(B) *FTO* (ETDRS grade  $\geq 30$  case definition)

| Haplotype                                                                                                                        | Frequency in Cases | Frequency in Controls | Chi Square | p value |
|----------------------------------------------------------------------------------------------------------------------------------|--------------------|-----------------------|------------|---------|
| Haplotype 1: rs6499654 rs10521305 rs10521303 rs4784329                                                                           |                    |                       |            |         |
| TTTC                                                                                                                             | 0.25               | 0.44                  | 2.68       | 0.10    |
| TTTA                                                                                                                             | 0.05               | 0.07                  | 0.12       | 0.73    |
| TCGA                                                                                                                             | 0.05               | 0.08                  | 0.21       | 0.65    |
| CTGA                                                                                                                             | 0.05               | 0.03                  | 0.28       | 0.60    |
| TTGA                                                                                                                             | 0.60               | 0.38                  | 3.54       | 0.06    |
| Haplotype 2: rs9931209 rs9934504 rs1558755                                                                                       |                    |                       |            |         |
| TGC                                                                                                                              | 0.45               | 0.42                  | 0.51       | 0.48    |
| GAT                                                                                                                              | 0.02               | 0.03                  | 0.83       | 0.36    |
| TAT                                                                                                                              | 0.18               | 0.13                  | 2.13       | 0.14    |
| TGT                                                                                                                              | 0.35               | 0.41                  | 2.01       | 0.16    |
| Haplotype 3: rs12149433 rs9926180 rs7500562 rs12933928 rs13335343 rs1362570 rs16952634 rs17222465 rs2111112 rs10852525 rs9929152 |                    |                       |            |         |
| CAGGGTGCCGA                                                                                                                      | 0.20               | 0.21                  | 0.02       | 0.89    |
| CTCAGTACTAG                                                                                                                      | 0.01               | 0.02                  | 1.58       | 0.21    |
| CAGAGTGACGA                                                                                                                      | 0.27               | 0.33                  | 1.81       | 0.18    |
| CAGAGTGCCGA                                                                                                                      | 0.22               | 0.23                  | 0.07       | 0.79    |
| GTCAACGCTAG                                                                                                                      | 0.13               | 0.09                  | 2.80       | 0.09    |
| CTCAGTACTGG                                                                                                                      | 0.15               | 0.10                  | 2.32       | 0.13    |
| CTCAGTGCTGG                                                                                                                      | 0.01               | 0.01                  | 0.02       | 0.89    |
| Haplotype 4: rs8056040 rs12935710                                                                                                |                    |                       |            |         |
| AT                                                                                                                               | 0.30               | 0.23                  | 3.44       | 0.06    |
| GC                                                                                                                               | 0.10               | 0.11                  | 0.08       | 0.78    |
| AC                                                                                                                               | 0.61               | 0.67                  | 2.18       | 0.14    |
| Haplotype 5: rs12708942 rs9806929 rs7197167 rs4783824                                                                            |                    |                       |            |         |
| AAGT                                                                                                                             | 0.13               | 0.09                  | 3.51       | 0.06    |
| TGGC                                                                                                                             | 0.17               | 0.14                  | 1.40       | 0.24    |
| TGTC                                                                                                                             | 0.70               | 0.78                  | 5.06       | 0.02    |
| Haplotype 6: rs12232391 rs7193851 rs8053966 rs17821714                                                                           |                    |                       |            |         |
| GTTA                                                                                                                             | 0.08               | 0.07                  | 0.09       | 0.77    |
| TCCG                                                                                                                             | 0.18               | 0.16                  | 0.49       | 0.48    |
| TTCG                                                                                                                             | 0.007              | 0.03                  | 2.18       | 0.14    |
| GTTG                                                                                                                             | 0.27               | 0.26                  | 0.05       | 0.81    |
| TTTG                                                                                                                             | 0.47               | 0.49                  | 0.17       | 0.68    |

(C) *IDUA* (ETDRS grade  $\geq 30$  case definition). The variant associated to DR in CARE, rs6856425, is within Haplotype 1, which is significantly associated to DR as well.

| Haplotype 1: rs11248060 rs6829197 |                    |                       |            |                      |
|-----------------------------------|--------------------|-----------------------|------------|----------------------|
| Haplotype                         | Frequency in Cases | Frequency in Controls | Chi Square | p value              |
| TC                                | 0.13               | 0.13                  | 0.009      | 0.93                 |
| CC                                | 0.14               | 0.05                  | 19.06      | $1.3 \times 10^{-5}$ |
| CG                                | 0.74               | 0.82                  | 6.58       | 0.01                 |
| Haplotype 2: rs3755955 rs6831280  |                    |                       |            |                      |
| CG                                | 0.48               | 0.43                  | 0.57       | 0.45                 |
| TT                                | 0.15               | 0.14                  | 0.06       | 0.80                 |
| CT                                | 0.37               | 0.44                  | 0.87       | 0.35                 |
| Haplotype 3: rs4583705 rs3822030  |                    |                       |            |                      |
| AA                                | 0.16               | 0.15                  | 0.07       | 0.80                 |
| GG                                | 0.84               | 0.85                  | 0.07       | 0.80                 |

(D) *PDE4D* (ETDRS grade  $\geq 14$  case definition)

| Haplotype 1: rs153981 rs187645 rs889231 rs27168 rs13169097 rs1824159                          |                    |                       |            |                      |
|-----------------------------------------------------------------------------------------------|--------------------|-----------------------|------------|----------------------|
| Haplotype                                                                                     | Frequency in Cases | Frequency in Controls | Chi Square | p value              |
| AGTCCT                                                                                        | 0.14               | 0.09                  | 7.69       | 0.006                |
| CGCCTC                                                                                        | 0.08               | 0.08                  | 0.09       | 0.76                 |
| AGCTCC                                                                                        | 0.05               | 0.08                  | 3.06       | 0.08                 |
| AGTCCC                                                                                        | 0.20               | 0.27                  | 7.00       | 0.008                |
| CACCCC                                                                                        | 0.08               | 0.08                  | 0.11       | 0.74                 |
| CGCCCC                                                                                        | 0.45               | 0.40                  | 2.56       | 0.11                 |
| Haplotype 2: rs27171 rs17780836                                                               |                    |                       |            |                      |
| GT                                                                                            | 0.17               | 0.15                  | 0.75       | 0.39                 |
| GC                                                                                            | 0.13               | 0.12                  | 0.31       | 0.58                 |
| AC                                                                                            | 0.70               | 0.73                  | 1.23       | 0.27                 |
| Haplotype 3: rs40122 rs35260 rs10472105 rs35259                                               |                    |                       |            |                      |
| AAGT                                                                                          | 0.36               | 0.49                  | 16.44      | $5.0 \times 10^{-5}$ |
| AGAC                                                                                          | 0.11               | 0.07                  | 4.59       | 0.03                 |
| TGGC                                                                                          | 0.44               | 0.37                  | 4.59       | 0.03                 |
| AGGC                                                                                          | 0.10               | 0.07                  | 2.38       | 0.12                 |
| Haplotype 4: rs35258 rs958851 rs17781354 rs13176940 rs13153653 rs6450517 rs17725522 rs6897015 |                    |                       |            |                      |
| GGGTGGTG                                                                                      | 0.19               | 0.28                  | 9.52       | 0.002                |
| TGGTGGTG                                                                                      | 0.44               | 0.37                  | 4.89       | 0.03                 |
| GGGCAATG                                                                                      | 0.10               | 0.07                  | 4.22       | 0.04                 |
| GTGCGATC                                                                                      | 0.08               | 0.10                  | 1.36       | 0.24                 |
| GGGCGACG                                                                                      | 0.10               | 0.06                  | 3.45       | 0.06                 |
| GTACGGTG                                                                                      | 0.09               | 0.11                  | 1.54       | 0.21                 |

Supplementary Table S4. Mean values for the covariates included in the logistic regression model by cohort for European American cases and controls. Results are presented as mean  $\pm$  standard deviation. P values are for the t test comparing cases to controls in each cohort. Cases are defined as having an ETDRS grade  $\geq$  14.

|      | Mean Age (years) |                |         | Mean Diabetes Duration (years) |               |                         | Mean Fasting Glucose (mg/dL) |              |                        | Mean Total Cholesterol (mg/dL) |              |         | Mean Systolic BP (mm Hg) |              |         | Mean Diastolic BP (mm Hg) |             |         |
|------|------------------|----------------|---------|--------------------------------|---------------|-------------------------|------------------------------|--------------|------------------------|--------------------------------|--------------|---------|--------------------------|--------------|---------|---------------------------|-------------|---------|
|      | Cases            | Controls       | p value | Cases                          | Controls      | p value                 | Cases                        | Controls     | p value                | Cases                          | Controls     | p value | Cases                    | Controls     | p value | Cases                     | Controls    | p value |
| ARIC | 62.1 $\pm$ 5.7   | 60.8 $\pm$ 5.5 | 0.01    | 14.7 $\pm$ 10.6                | 6.8 $\pm$ 7.9 | 2.2 x 10 <sup>-18</sup> | 197 $\pm$ 72                 | 164 $\pm$ 52 | 3.5 x 10 <sup>-9</sup> | 203 $\pm$ 43                   | 211 $\pm$ 44 | 0.03    | 140 $\pm$ 24             | 134 $\pm$ 21 | 0.002   | 74 $\pm$ 13               | 74 $\pm$ 12 | 0.22    |
| CHS  | 79.2 $\pm$ 4.7   | 78.0 $\pm$ 4.2 | 0.12    | 16.1 $\pm$ 11.2                | 9.1 $\pm$ 8.9 | 0.0003                  | 170 $\pm$ 51                 | 148 $\pm$ 39 | 0.006                  | 205 $\pm$ 46                   | 189 $\pm$ 34 | 0.02    | 150 $\pm$ 23             | 143 $\pm$ 22 | 0.17    | 71 $\pm$ 10               | 73 $\pm$ 11 | 0.5     |
| MESA | 64.3 $\pm$ 10.6  | 66.4 $\pm$ 9.6 | 0.26    | 16.8 $\pm$ 10.3                | 7.7 $\pm$ 6.5 | 6.7 x 10 <sup>-6</sup>  | 155 $\pm$ 46                 | 137 $\pm$ 33 | 0.009                  | 183 $\pm$ 38                   | 179 $\pm$ 37 | 0.53    | 137 $\pm$ 21             | 139 $\pm$ 21 | 0.67    | 73 $\pm$ 10               | 76 $\pm$ 12 | 0.08    |

ETDRS=Early Treatment Diabetic Retinopathy Study, BP= blood pressure

Supplementary Table S5. P values for comparison of European American cases and controls for the first three principal components of the IBC analyses

| Principal component | p value, case definition<br>ETDRS grade $\geq$ 14 | p value, case definition<br>ETDRS grade $\geq$ 30 |
|---------------------|---------------------------------------------------|---------------------------------------------------|
| 1                   | 0.78                                              | 0.66                                              |
| 2                   | 0.17                                              | 0.11                                              |
| 3                   | 0.34                                              | 0.36                                              |

IBC=ITMAT-Broad-CARe Chip, ETDRS=Early Treatment Diabetic Retinopathy Study,

Supplementary Table S6. Replication results in Europeans including only groups that used ETDRS grading consistently and included type 2 diabetes participants

|           |              | ARIC                            |  | CHS  |                      | MESA |         | AGES |         |      | BMES |         |      | FIND-Eye |         |      | Lublin |         |      | Meta-Analysis (Fixed Effects) |         |         |      |         |
|-----------|--------------|---------------------------------|--|------|----------------------|------|---------|------|---------|------|------|---------|------|----------|---------|------|--------|---------|------|-------------------------------|---------|---------|------|---------|
|           |              | Number of controls              |  | 160  |                      | 140  |         | 249  |         |      | 175  |         |      | 627      |         |      | 620    |         |      |                               |         |         |      |         |
|           |              | Number of cases ETDRS $\geq$ 14 |  | 33   |                      | 36   |         | 92   |         |      | 67   |         |      | 105      |         |      | 576    |         |      |                               |         |         |      |         |
|           |              | Number of cases ETDRS $\geq$ 30 |  | 20   |                      | 11   |         | 37   |         |      | 26   |         |      | NA       |         |      | 138    |         |      |                               |         |         |      |         |
| SNP       | Minor Allele | Definition of Cases             |  | OR   | p value              | OR   | p value | OR   | p value | MAF  | OR   | p value | MAF  | OR       | p value | MAF  | OR     | p value | MAF  | OR                            | p value | Z score | OR   | p value |
| rs9332570 | G            | ETDRS $\geq$ 14                 |  | 0.43 | 0.0001               | 0.33 | 0.02    | 0.49 | 0.06    | NA   | 0.75 | 0.26    | 0.21 | 1.24     | 0.42    | 0.19 | 0.79   | 0.26    | NA   | NA                            | NA      | -2.71   | 0.75 | 0.007   |
| rs35260   | A            | ETDRS $\geq$ 14                 |  | 0.68 | 0.002                | 0.59 | 0.08    | 0.29 | 0.0001  | NA   | 1.01 | 0.98    | 0.49 | 1.23     | 0.32    | 0.48 | 0.9    | 0.45    | NA   | NA                            | NA      | -3.08   | 0.8  | 0.002   |
| rs6128    | T            | ETDRS $\geq$ 14                 |  | 0.48 | 0.0007               | 0.27 | 0.02    | 0.39 | 0.03    | 0.09 | 1.27 | 0.32    | 0.21 | 1.27     | 0.37    | 0.17 | 0.73   | 0.14    | 0.16 | 1.01                          | 0.96    | -1.84   | 0.87 | 0.07    |
| rs7168655 | A            | ETDRS $\geq$ 14                 |  | 1.59 | 0.0004               | 1.78 | 0.04    | 1.48 | 0.15    | NA   | 0.91 | 0.57    | 0.34 | 0.96     | 0.83    | 0.36 | 1.08   | 0.63    | NA   | NA                            | NA      | 2.86    | 1.24 | 0.004   |
| rs6133    | A            | ETDRS $\geq$ 14                 |  | 0.39 | 0.0005               | 0.19 | 0.03    | 0.51 | 0.16    | 0.15 | 0.73 | 0.32    | 0.14 | 1.37     | 0.28    | 0.13 | 0.72   | 0.17    | 0.08 | 1.03                          | 0.84    | -2.23   | 0.8  | 0.03    |
| rs3917779 | A            | ETDRS $\geq$ 14                 |  | 0.40 | 0.0007               | 0.20 | 0.03    | 0.51 | 0.16    | 0.09 | 0.73 | 0.32    | 0.14 | 1.25     | 0.45    | 0.12 | 0.72   | 0.19    | NA   | NA                            | NA      | -3.19   | 0.66 | 0.001   |
| rs6856425 | C            | ETDRS $\geq$ 14                 |  | 2.48 | 0.01                 | 5.21 | 0.004   | 2.63 | 0.16    | 0.04 | 0.89 | 0.86    | 0.02 | 1.8      | 0.45    | 0.02 | 1.18   | 0.75    | 0.05 | 0.7                           | 0.07    | 0.96    | 1.15 | 0.34    |
| rs7105871 | C            | ETDRS $\geq$ 14                 |  | 0.47 | $1.7 \times 10^{-5}$ | 0.97 | 0.91    | 0.86 | 0.62    | NA   | 0.81 | 0.2     | 0.25 | 1.16     | 0.54    | 0.22 | 0.88   | 0.47    | NA   | NA                            | NA      | -2.95   | 0.77 | 0.003   |
| rs6856425 | C            | ETDRS $\geq$ 30                 |  | 3.19 | 0.003                | 6.8  | 0.002   | 3.25 | 0.19    | NA   | NA   | NA      | NA   | NA       | NA      | NA   | NA     | NA      | 0.05 | 0.46                          | 0.06    | 2.36    | 1.78 | 0.02    |

All results are adjusted for age and gender.

ETDRS=Early Treatment Diabetic Retinopathy Study, MAF=minor allele frequency, OR=odds ratio, NA=not available



Supplementary Table S7. Percent power of the association study in discovery and replication cohorts for diabetic retinopathy defined as ETDRS grade  $\geq 14$  for different allele frequencies and genotype relative risks (GRR), assuming an additive model, a prevalence of diabetic retinopathy in the type 2 diabetes population of 0.3 and an alpha of  $1 \times 10^{-6}$ . The power calculations were obtained using the Genetic Power Calculator at <http://pngu.mgh.harvard.edu/~purcell/gpc>.

|     | Discovery Cohort<br>CARE (221 cases, 1032 controls) |     |     | AGES<br>(92 cases, 249 controls) |     |     | BMES<br>(67 cases, 175 controls) |     |     | FIND-Eye<br>(105 cases, 627 controls) |     |     | FinnDiane<br>(2009 cases, 570 controls) |     |     | Go-DARTS<br>(923 cases, 774 controls) |     |     | Lublin<br>(576 cases, 630 controls) |     |     | Combined Replication Cohorts<br>(3772 cases, 3025 controls) |     |     |
|-----|-----------------------------------------------------|-----|-----|----------------------------------|-----|-----|----------------------------------|-----|-----|---------------------------------------|-----|-----|-----------------------------------------|-----|-----|---------------------------------------|-----|-----|-------------------------------------|-----|-----|-------------------------------------------------------------|-----|-----|
|     | GRR                                                 |     |     | GRR                              |     |     | GRR                              |     |     | GRR                                   |     |     | GRR                                     |     |     | GRR                                   |     |     | GRR                                 |     |     |                                                             |     |     |
| MAF | 1.25                                                | 1.4 | 1.5 | 1.25                             | 1.4 | 1.5 | 1.25                             | 1.4 | 1.5 | 1.25                                  | 1.4 | 1.5 | 1.25                                    | 1.4 | 1.5 | 1.25                                  | 1.4 | 1.5 | 1.25                                | 1.4 | 1.5 | 1.25                                                        | 1.4 | 1.5 |
| 0.1 | 0                                                   | 5   | 20  | 0                                | 0   | 1   | 0                                | 0   | 0   | 0                                     | 0   | 2   | 2                                       | 33  | 70  | 3                                     | 37  | 75  | 1                                   | 16  | 46  | 83                                                          | 100 | 100 |
| 0.2 | 1                                                   | 22  | 58  | 0                                | 1   | 3   | 0                                | 0   | 1   | 0                                     | 2   | 10  | 15                                      | 84  | 99  | 15                                    | 85  | 99  | 5                                   | 57  | 90  | 100                                                         | 100 | 100 |
| 0.3 | 2                                                   | 36  | 74  | 0                                | 1   | 6   | 0                                | 0   | 2   | 0                                     | 5   | 16  | 30                                      | 96  | 100 | 29                                    | 96  | 100 | 11                                  | 78  | 98  | 100                                                         | 100 | 100 |
| 0.4 | 3                                                   | 40  | 76  | 0                                | 2   | 7   | 0                                | 1   | 2   | 0                                     | 5   | 17  | 40                                      | 98  | 100 | 37                                    | 98  | 100 | 15                                  | 84  | 99  | 100                                                         | 100 | 100 |
| 0.5 | 3                                                   | 37  | 71  | 0                                | 2   | 6   | 0                                | 1   | 2   | 0                                     | 5   | 15  | 42                                      | 99  | 100 | 38                                    | 98  | 100 | 16                                  | 83  | 98  | 100                                                         | 100 | 100 |

ETDRS=Early Treatment Diabetic Retinopathy Study, MAF=minor allele frequency

Supplementary Figure S1. Forest plots showing odds ratios and 95% confidence intervals for the association between each variant and DR (case definition ETDRS grade  $\geq 14$  unless otherwise noted) by cohort with the CMH replication meta-analysis result represented as a diamond.

(A) rs9332570

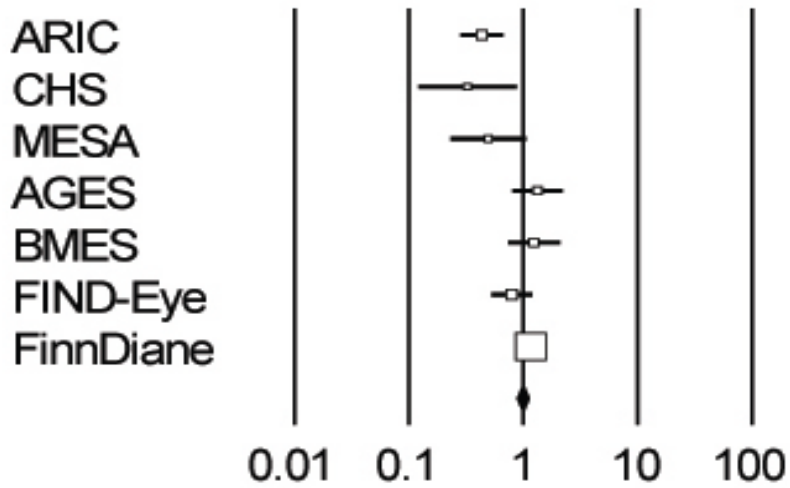

(B) rs35260

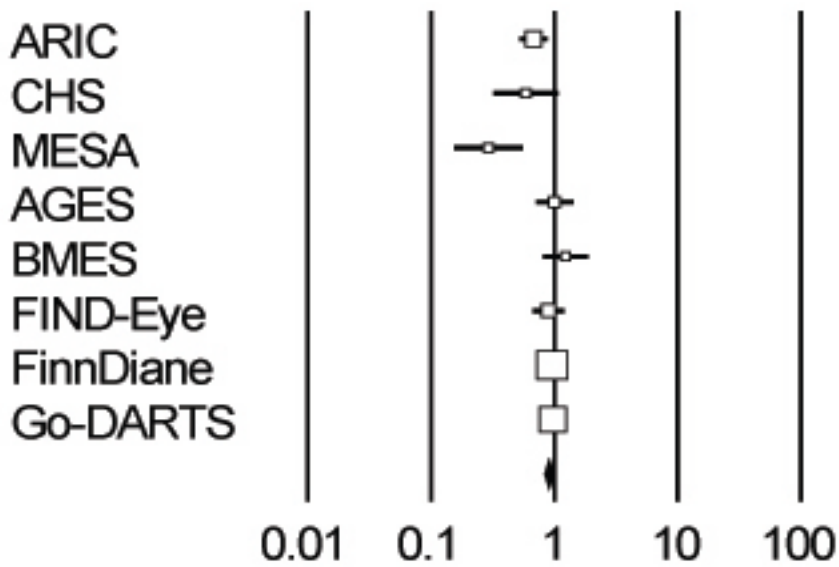

(C) rs6128

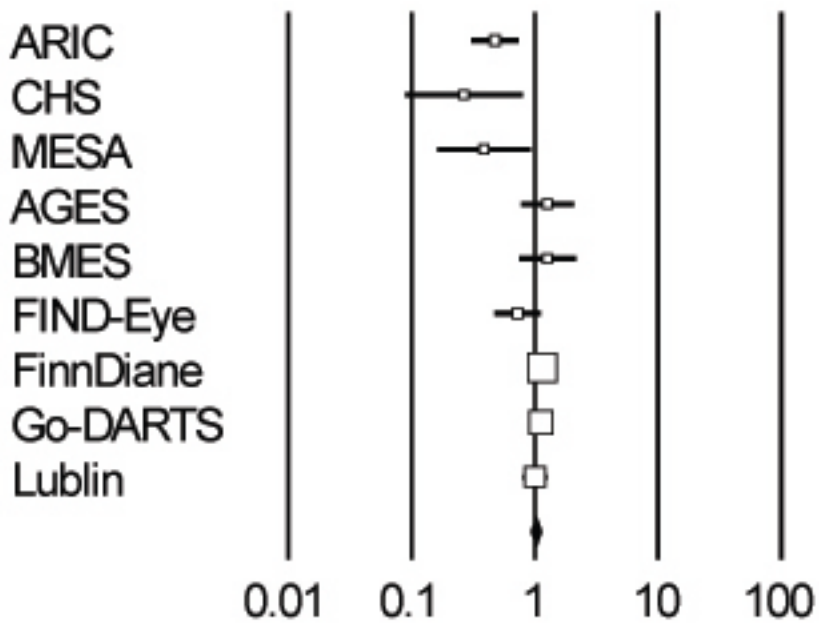

(D) rs7168655

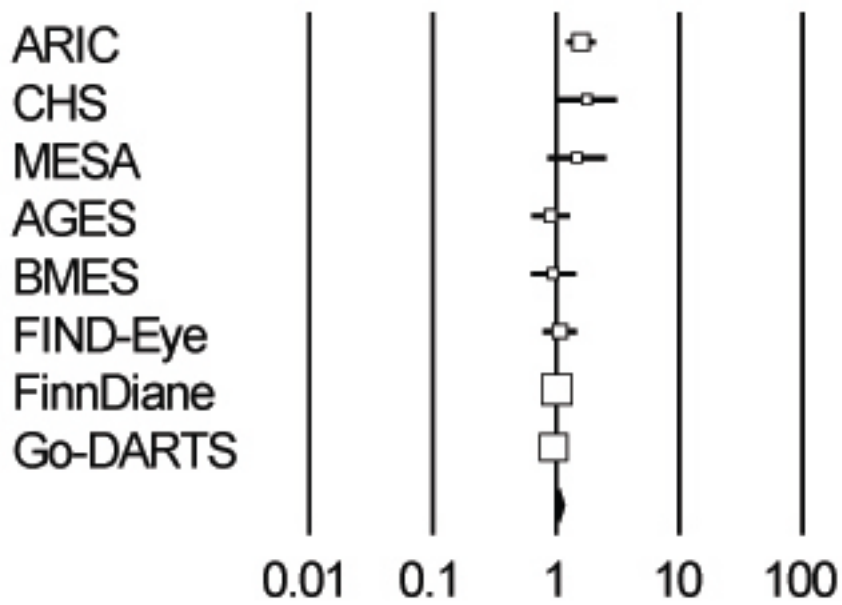

(E) rs6133

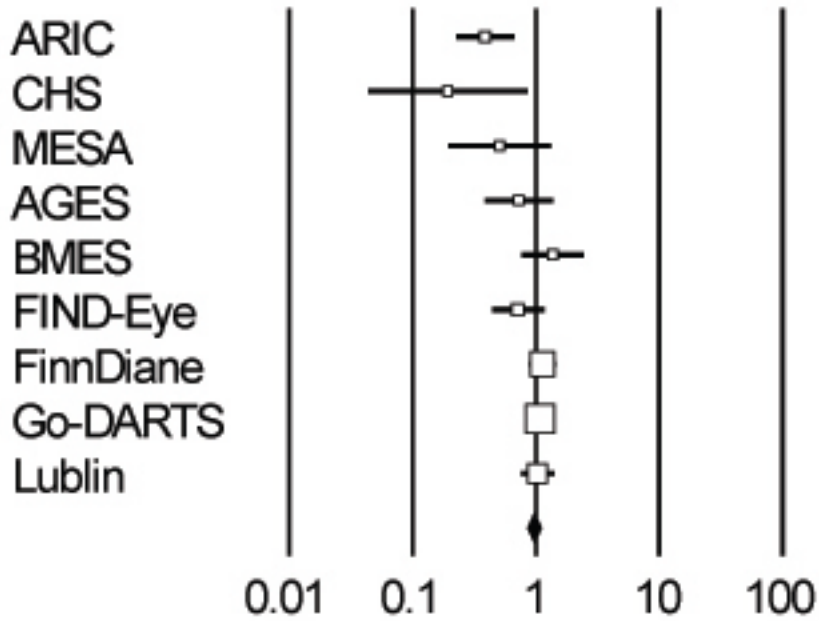

(F) rs3917779

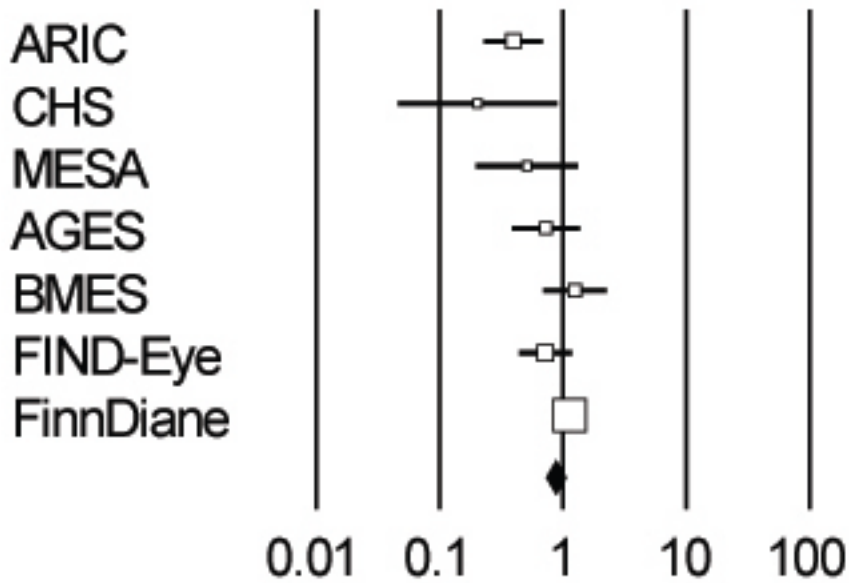

(G) rs6856425, for definition of DR cases as ETDRS grade  $\geq 14$

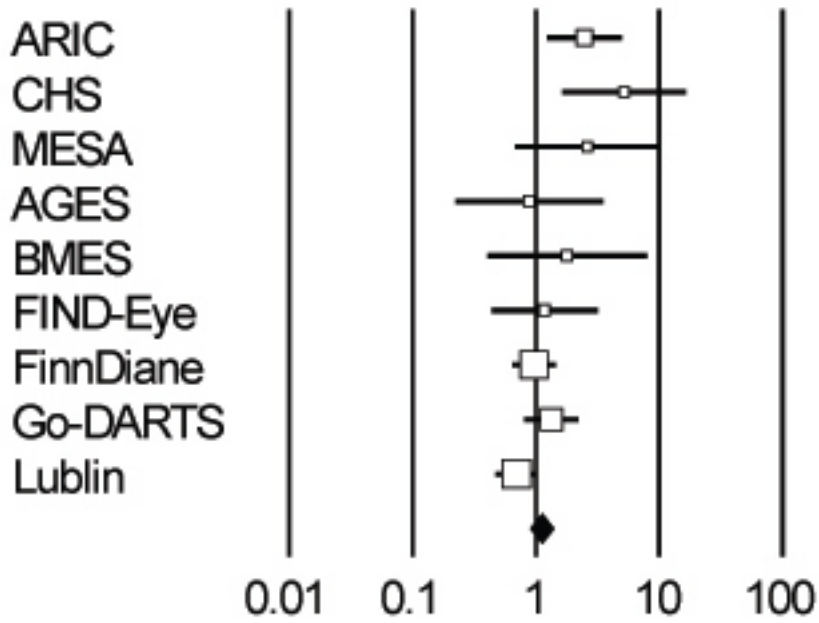

(H) rs7105871

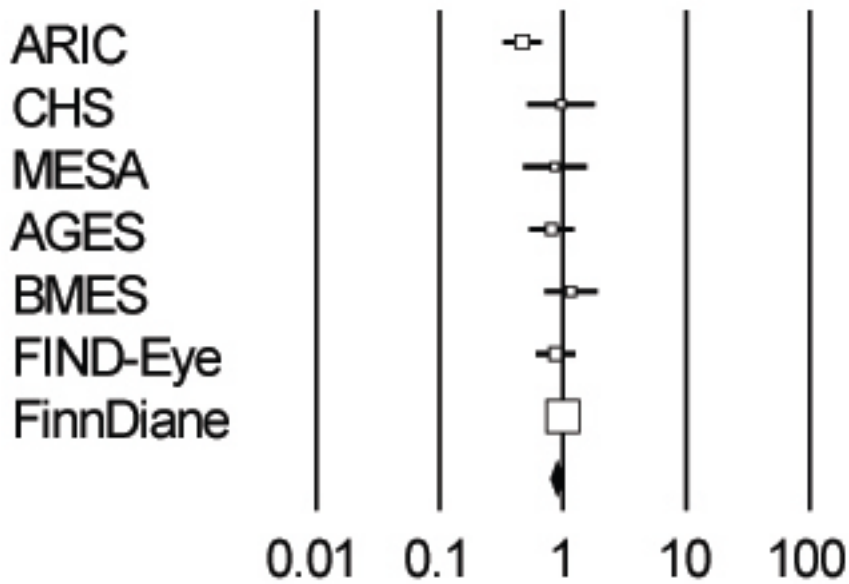

(I) rs6856425, for definition of DR cases as ETDRS grade  $\geq 30$

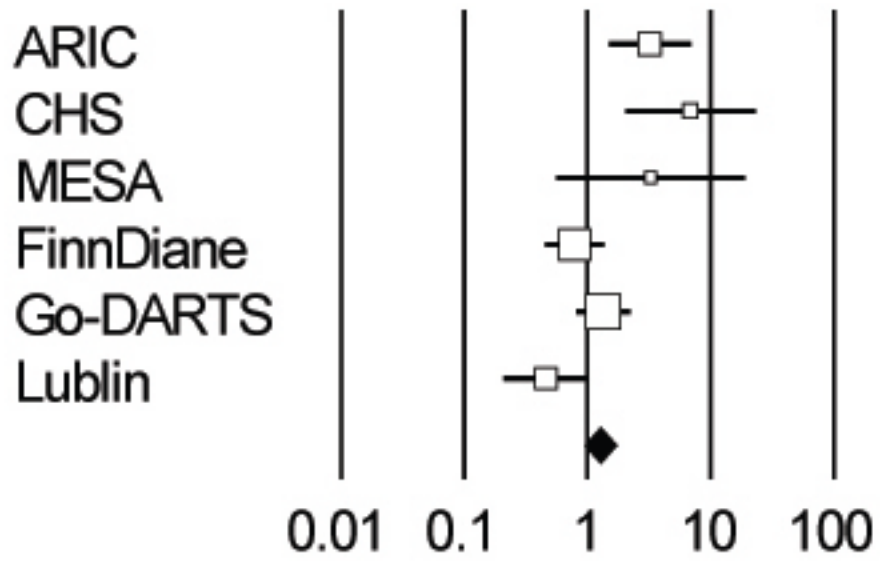

ETDRS=Early Treatment Diabetic Retinopathy Study, DR=diabetic retinopathy,

CMH=Cochran-Mantel-Haenszel

Supplementary Figure S2. Linkage disequilibrium (LD) plots for genes associated with diabetic retinopathy in CARE, including the SNPs associated with diabetic nephropathy or type 2 diabetes in previous studies. Numbers within blocks represent r squared values.

(A) LD plot of all *SELP* SNPs included on ITMAT-Broad-CARe (IBC) Chip and in HapMap, including rs6131, the SNP previously associated with diabetic microalbuminuria. (B) LD plot of *FTO* SNPs included on IBC Chip and in HapMap surrounding rs9926180, the most highly associated SNP in CARE, and rs9939609, the SNP associated previously to type 2 diabetes.

(A)

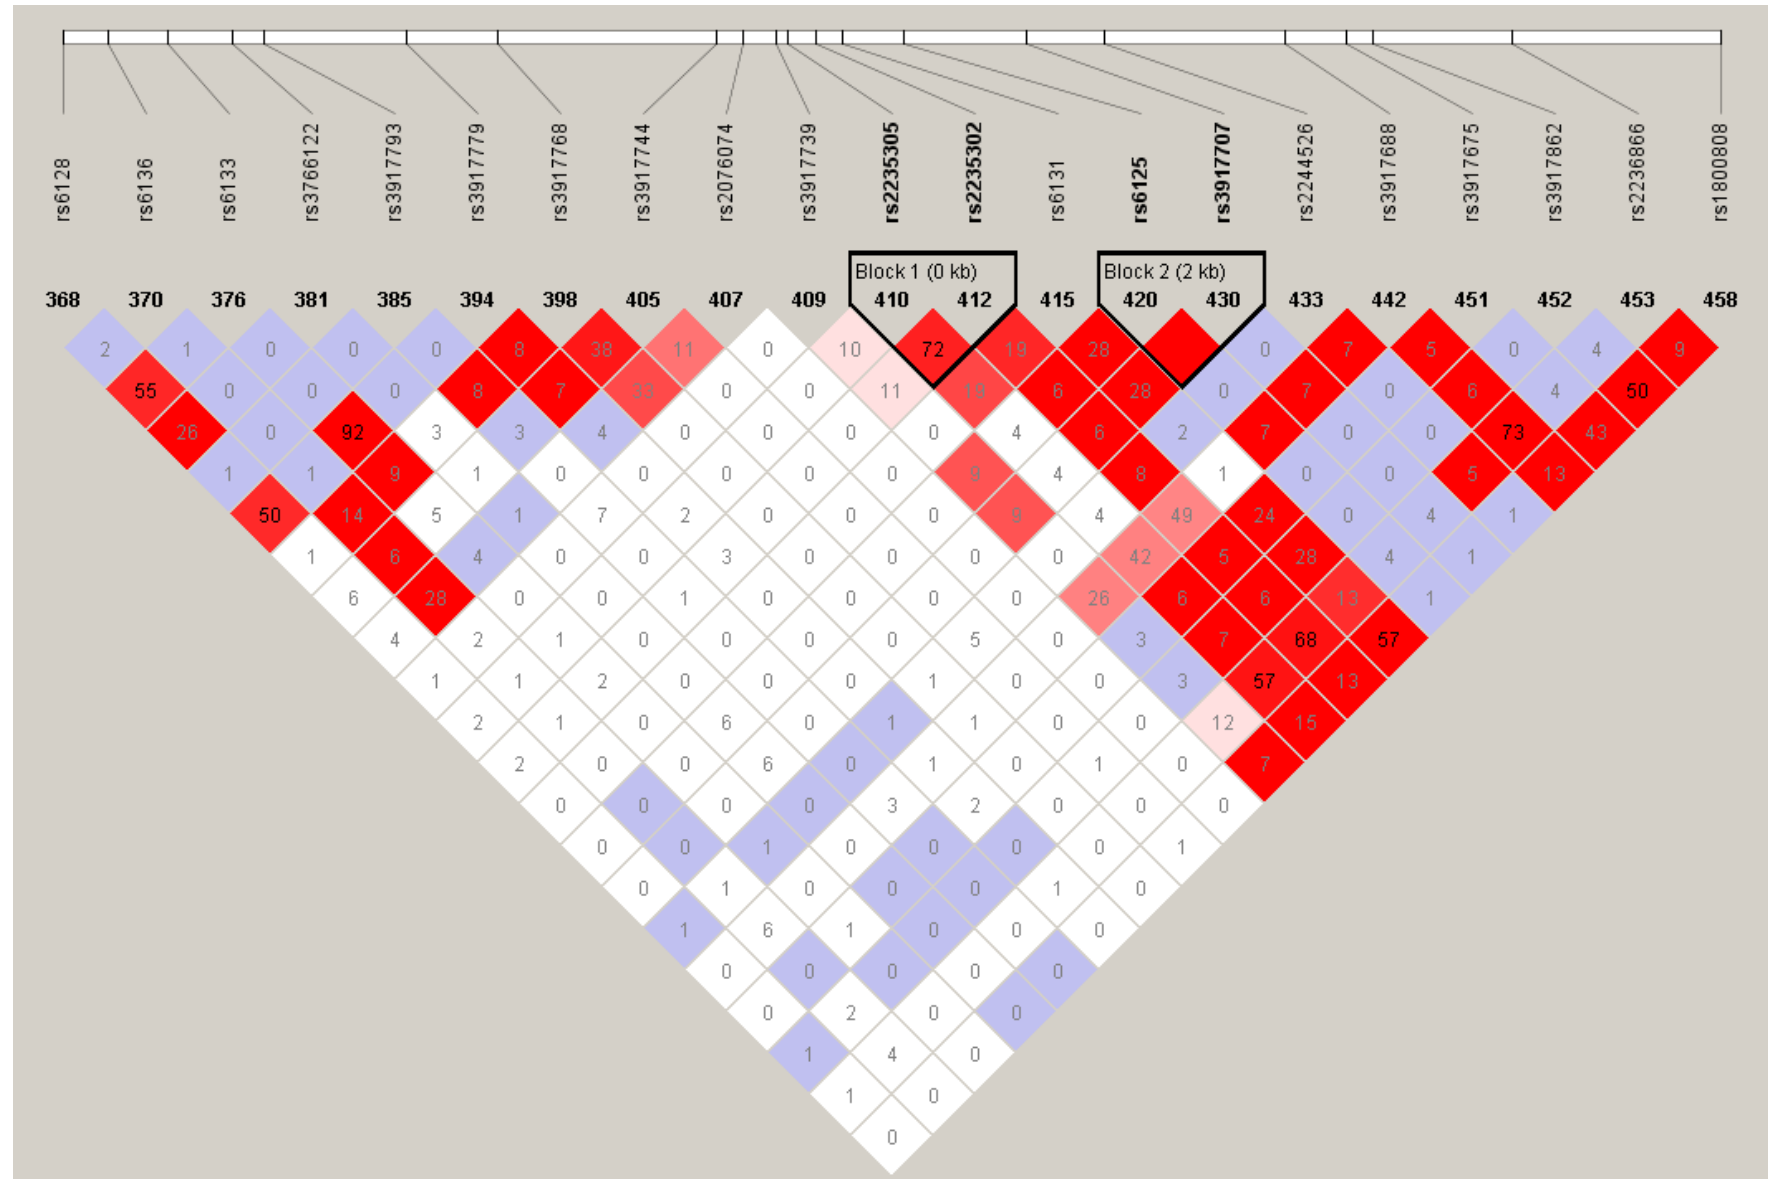

(B)

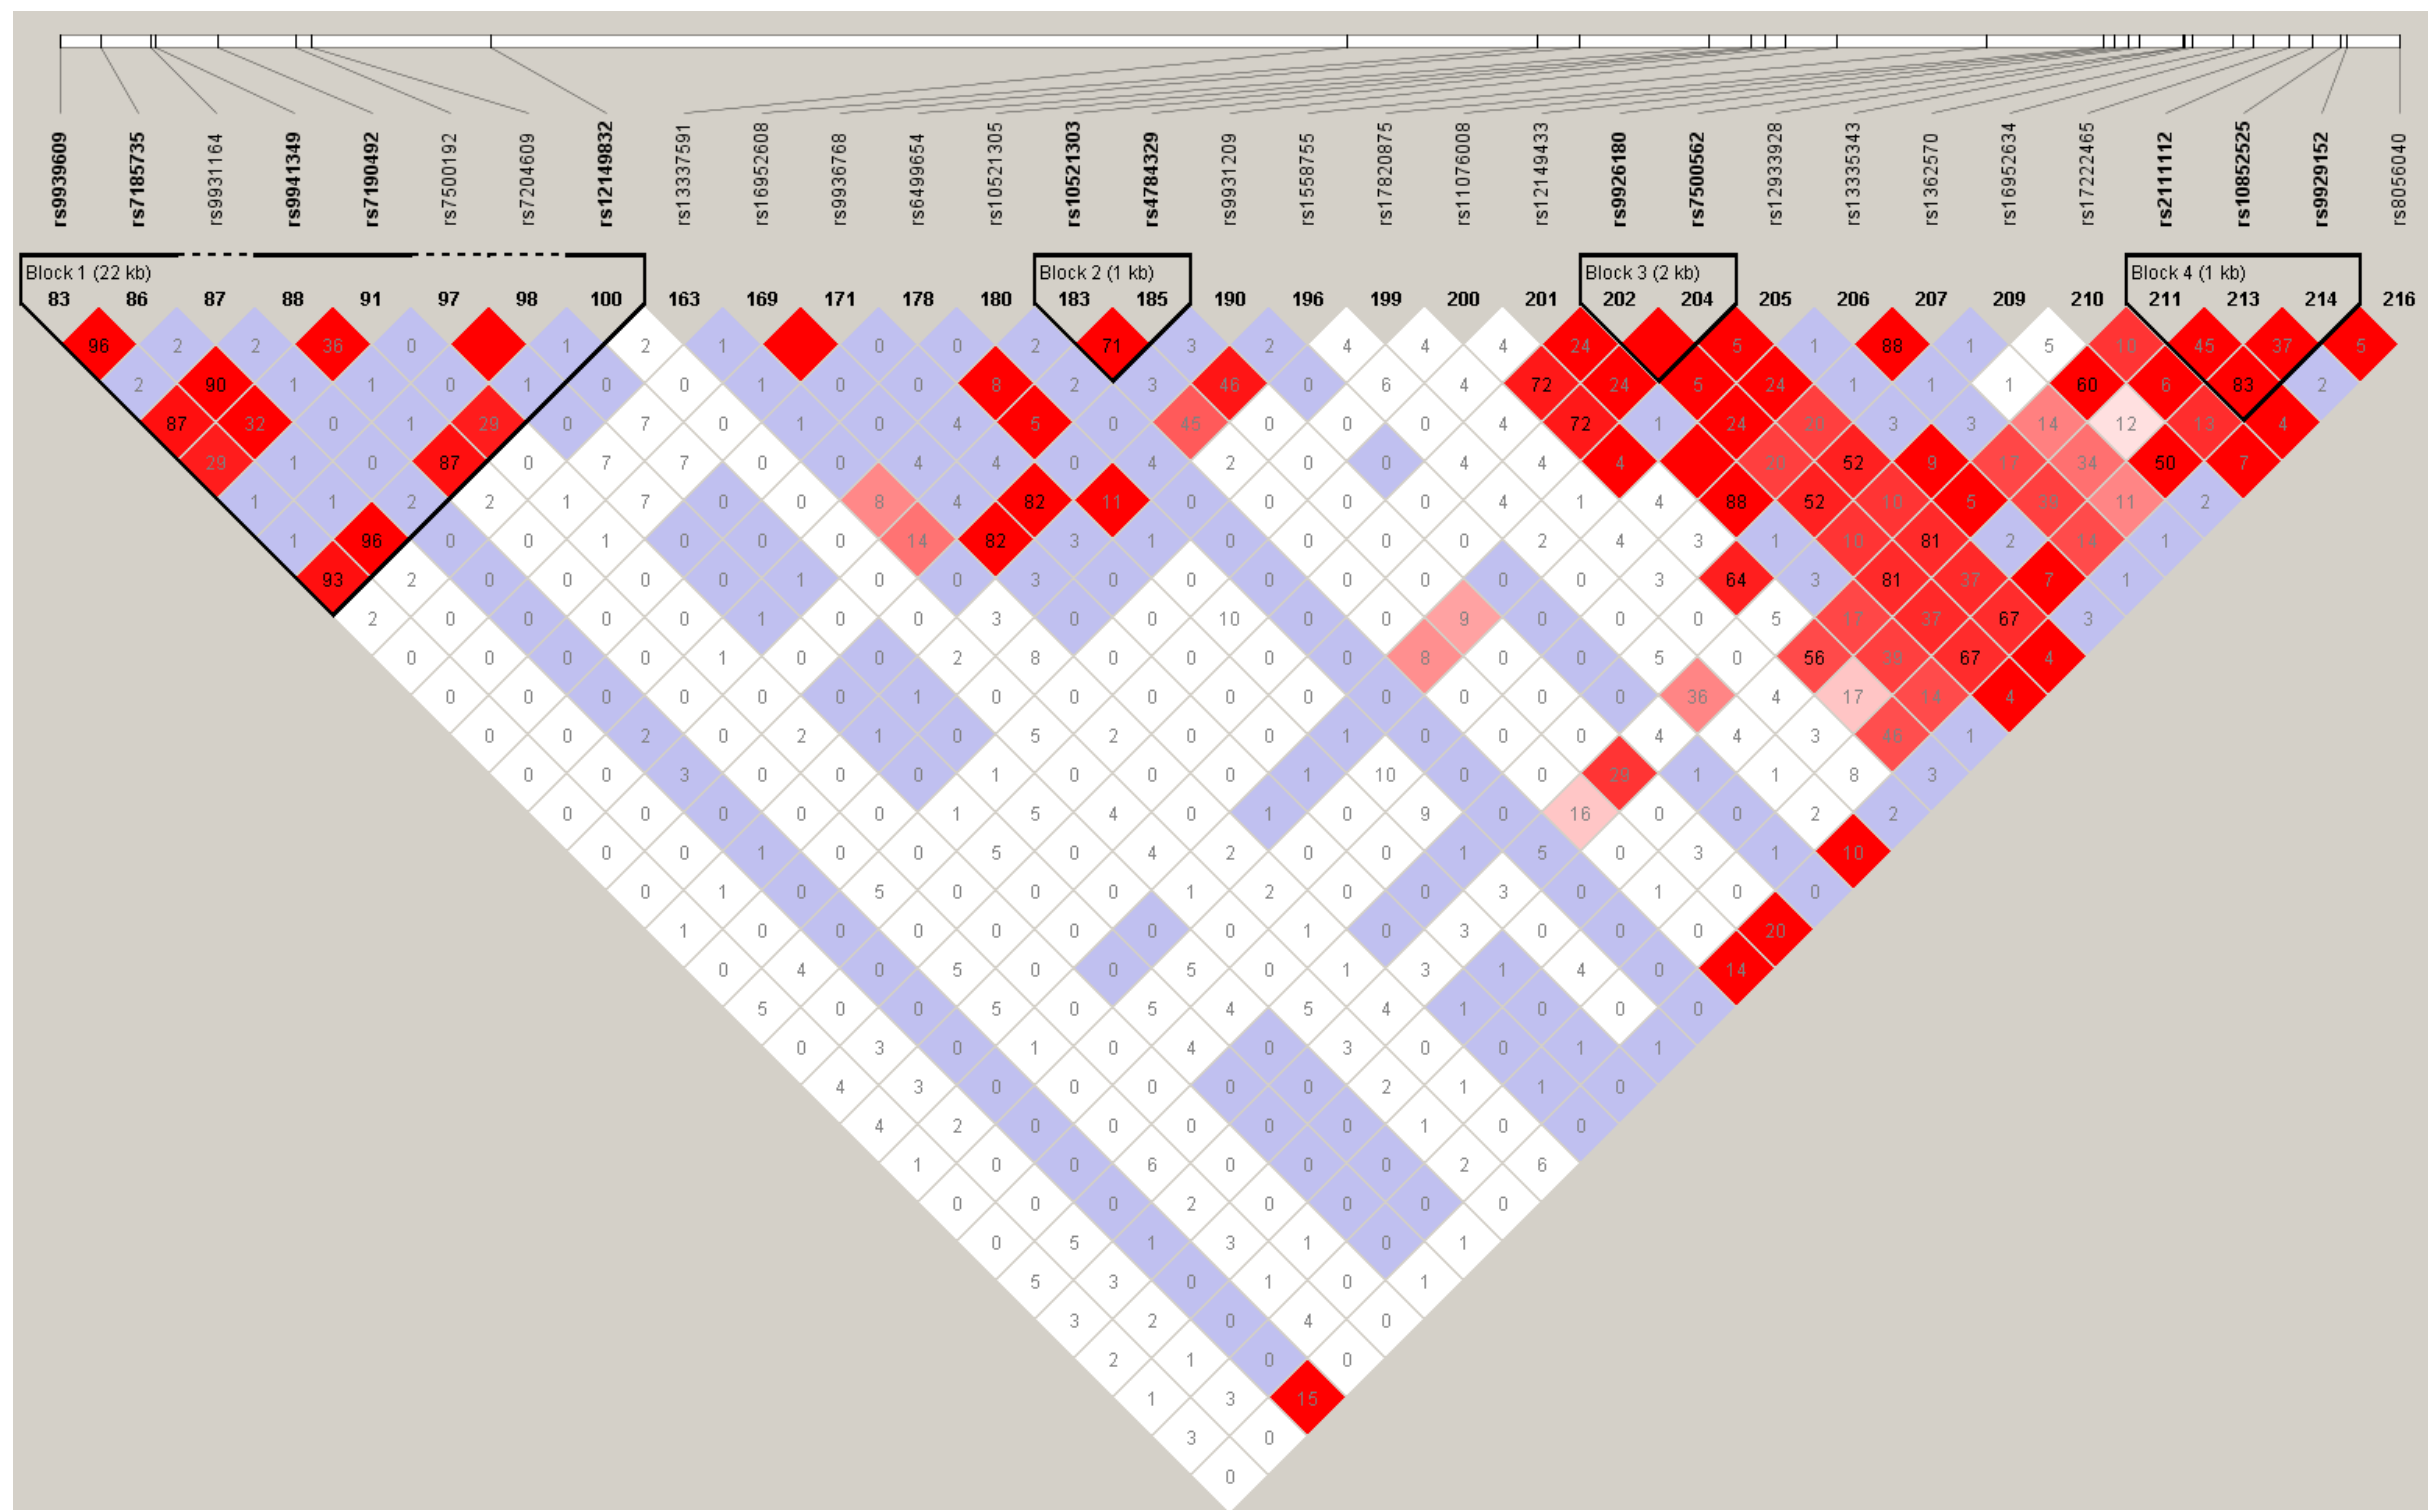



## Supplementary Methods

### *CARe SNP Selection Criteria*

Single nucleotide polymorphisms (SNPs) were chosen to densely map about 2,000 candidate genes relevant to phenotypes available in CARe. The density of the mapping varied as follows.<sup>1</sup> For 435 loci in genes and regions with a high likelihood of functional significance including established mediators of vascular disease and loci derived from genome-wide association studies (GWAS), tag SNPs were selected to capture known variation with  $MAF \geq 0.02$  and an  $r^2 \geq 0.8$  in HapMap populations. For 1,349 loci that were deemed to be potentially involved in phenotypes of interest or established loci that required very large numbers of tagging SNPs, SNPs were selected for  $MAF \geq 0.05$  with an  $r^2 \geq 0.5$  in HapMap populations. The last 232 loci were comprised mainly of the larger genes ( $> 100$  kb) which were of lower interest *a priori* to the consortium investigators. Only non-synonymous SNPs and known functional variants of  $MAF \geq 0.01$  were captured for these loci.

### *CARe Genotyping Quality Control (QC)*

DNA concentration was determined by the Picogreen assay (Invitrogen, Carlsbad, Calif) before storage in 2D bar-coded 0.75 mL Matrix tubes at  $-20^{\circ}\text{C}$  in the SmARtStore (RTS, Manchester, UK) automated sample handling system. As an initial quality check, seven SNPs that were selected because of previous strong associations to cardiovascular disease were genotyped using the Sequenom MassArray System platform (Sequenom, San Diego, Calif). All DNA samples passing initial quality checks were plated at a concentration of  $5 \text{ ng}/\mu\text{L}$  for processing on the platform.

Several QC procedures were performed on the genotype data separately for each cohort. Sample duplicates were identified and for each set of duplicates or monozygotic twins, data from the sample with the highest genotyping success rate were retained. Reported sex and genotype-inferred sex (two independent Sequenom assays for each sample) were compared for concordance. All discordant samples and samples for which no sex information was available were resolved in consultation with the relevant cohort or excluded. SNPs with a missing data rate >10% and samples with a genotyping success rate <90% were removed. Because several different ethnic groups were represented, with the expectation of differing genotype frequencies and admixture, no filters were applied for minor allele frequency (MAF) or Hardy-Weinberg probability values. All QC analyses were performed in PLINK.<sup>2</sup>

#### *Replication Cohort Diabetic Retinopathy Definitions*

**AGES, BMES, SiMES, and SP2** fundus photographs were graded by the ETDRS scale used the same DR definitions as CARE. The fundus photographs for AGES were read by the University of Wisconsin Ocular Epidemiology Reading Center.

**Go-DARTS:** Go-DARTS defined DR cases as having either (1) severe retinopathy (four or more blot hemorrhages), venous beading or intraretinal microvascular abnormalities); or (2) proliferative retinopathy (new vessel formation or vitreous hemorrhage); or (3) evidence for diabetic-related laser photocoagulation treatment. The Go-DARTS controls were defined as having no record of any diabetic retinopathy. Genotyping of the Go-DARTS cohort was

performed with the Affymetrix 6.0 platform as part of the Wellcome Trust Case Control Consortium 2 and imputed to HapMap2 with IMPUTE2 as previously described.<sup>3</sup>

**FIND-Eye:** The fundus photographs for FIND-Eye were also read by the University of Wisconsin Ocular Epidemiology Reading Center. ETDRS grades were converted to a five-step scale: no DR (ETDRS = 10–12), mild NPDR (ETDRS = 14–20), moderate NPDR (ETDRS = 35–43), severe NPDR (ETDRS = 47–53), and proliferative DR (ETDRS  $\geq$  60). Accordingly, the following categories were created, based on the more severely involved eye: (1) no DR, (2) mild NPDR, (3) moderate NPDR, (4) severe NPDR, and (5) PDR. This five-step scale was used primarily in the case and control definitions. Specifically, cases were defined as grade of 4 or higher (mild nonproliferative DR or more severe, but not very mild NPDR) on a separate 24-step scale OR grade 2 or higher on this five-step scale. Controls were defined as grade of 3 or lower on the separate 24-step scale OR no fundus photograph AND less than grade 2 on the five-step scale.

**FinnDiane:** FinnDiane is a nationwide multicenter study of type 1 diabetes and its complications. All the patients in the proliferative retinopathy analysis (n=1632) had their classification based on fundus photographs (n=658) and/or fundus examinations performed by ophthalmologists. Those patients with images available had been photographed on a median of three separate occasions. All available ophthalmic data were used to score the severity of retinopathy according to the ETDRS scale by an ophthalmologist (KH) unaware of the demographic data and the presence or absence of other complications. The eye with the more severe retinopathy was used to represent the overall retinopathy severity for the particular patient. For patients who did not have ophthalmic records or fundus photographs available, DR

was classified as (1) laser-treated retinopathy, (2) background retinopathy, or (3) no retinopathy by their attending physician during their routine diabetes visits based on medical records. All controls were required to have a duration of type 1 diabetes of at least 10 years.

**Medical University of Lublin:** Patients were classified into three categories based on ETDRS grading of photographs or phenotype descriptions by referring ophthalmologists: (1) no retinopathy, (2) NPDR ranging from microaneurysms only to severe NPDR, and (3) PDR.

Supplementary Research Support Information:

**ARIC:** A collaborative study supported by the National Heart, Lung and Blood Institute contracts N01-HC-55015, N01-HC-55016, N01-HC-55018, N01-HC-55019, N01-HC-55020, N01-HC-55021, N01-HC-55022 and R01HL087641; National Human Genome Research Institute award U01HG004402; NIH Intramural Research award ZIAEY000426 from the National Eye Institute; and National Institutes of Health contract HHSN268200625226C. Infrastructure was partly supported by Grant Number UL1RR025005, a component of the National Institutes of Health and NIH Roadmap for Medical Research. The authors thank the staff and participants of the ARIC study for their important contributions.

**MESA:** Supported by contracts N01-HC-95159 through N01-HC-95165 and N01-HC-95169 from the National Heart, Lung, and Blood Institute. The authors thank the other investigators, the staff, and the participants of the MESA study for their valuable contributions. A full list of participating MESA investigators and institutions can be found at <http://www.mesa-nhlbi.org>.

Additional support was provided by NIH grant HL69979-03 (RK and TY) and the NIH Intramural program award ZIAEY000403 (MFC).

**CHS:** Supported by contract numbers N01-HC-85078 through N01-HC-85086, N01-HC-35129, N01-HC-15103, N01-HC-55222, N01-HC-75150, N01-HC-4512, grant numbers U01 HL080295 and R01 HL087652 from the National Heart, Lung, and Blood Institute.

**JHS:** Support was provided by contracts N01-HC-95170, N01-HC-95171, and N01-HC-95172 from the National Heart, Lung, and Blood Institute and the National Center on Minority Health and Health Disparities.

**AGES:** Support provided by the Intramural Research Program of the National Institute on Aging (ZIAAG007380, NIH contract N01-AG-12100) and the National Eye Institute (ZIAEY000401) at the National Institutes of Health, Hjartavernd (the Icelandic Heart Association), and the Althingi (the Icelandic Parliament).

**BMES:** The Blue Mountains Eye Study has been supported by the Australian National Health & Medical Research Council, Canberra Australia (Grant Numbers 974159, 211069, 457349, 512423, 475604, 529912, and the funding for Centre for Clinical Research Excellence in Translational Clinical Research in Eye Diseases, CCRE in TCR-Eye); In addition, funding by the Wellcome Trust, UK (to A Viswanathan, P McGuffin, P Mitchell, F Topouzis, P Foster) has supported the genotyping costs of the entire BMES population.

The BMES GWAS group is: Paul Mitchell, Jie Jin Wang, and Elena Roachtchina from the Centre for Vision Research, Department of Ophthalmology and Westmead Millennium Institute, University of Sydney, NSW Australia; John Attia, Rodney Scott, and Elizabeth G. Holliday from the University of Newcastle, Newcastle, NSW Australia; Tien Yin Wong, Paul N Baird, and Jing Xie from the Centre for Eye Research Australia, Department of Ophthalmology, University of Melbourne; Michael Inouye from the Walter and Elisa Hall Institute of Medical Research, Victoria, Australia; Ananth Viswanathan from Moorfields Eye Hospital, London, UK; and Xueling Sim from the National University of Singapore.

**FIND-Eye:** Supported by grants U01DK57292, U01DK57329, U01DK057300, U01DK057298, U01DK057249, U01DK57295, U01DK070657, U01DK057303, U01DK070657, U01DK57304, from the National Institute of Diabetes and Digestive and Kidney Diseases (NIDDK) and, in part, by the Intramural Research Programs of the NIDDK and NEI, respectively. This project has been funded in whole or in part with federal funds from the National Cancer Institute, National Institutes of Health (NIH), under contract N01-CO12400 and the Intramural Research Program of the NIH, National Cancer Institute, Center for Cancer Research. This work was also supported by the National Center for Research Resources for the General Clinical Research Center (GCRC) grants: Case Western Reserve University, M01-RR-000080; Wake Forest University, M01-RR-07122; Harbor–University of California, Los Angeles Medical Center, M01-RR-00425; College of Medicine, University of California, Irvine, M01-RR-00827–29; University of New Mexico, HSC M01-RR-00997; and Frederic C. Bartter, M01-RR-01346.

## **Members of the Family Investigation of Nephropathy and Diabetes Research Group**

Genetic Analysis and Data Coordinating Center, Case Western Reserve University, Cleveland,

Ohio: SK Iyengar\*, RC Elston\*\*, KAB Goddard\*\*, JM Olson\*\* (deceased), RP Igo, Jr., S Ialacci<sup>#</sup>, C Fondran, J Fondran, A Horvath, G Jun, K Kramp, SRE Quade, M Slaughter, E Zaletel.

### Participating Investigator Centers:

Case Western Reserve University, Cleveland, OH: JR Sedor\*, J Schelling\*\*, A Sehgal\*\*, A Pickens<sup>#</sup>, L Humbert<sup>#</sup>, L Getz-Fradley<sup>#</sup>.

Harbor-University of California Los Angeles Medical Center: S Adler\*, HE Collins-Schramm\*\* §, E Ipp\*\*, H Li\*\* §, M Pahl\*\*†, MF Seldin\*\* §, J LaPage<sup>#</sup>, B Walker<sup>#</sup>, C Garcia<sup>#</sup>, J Gonzalez<sup>#</sup>, L Ingram-Drake<sup>#</sup>.

Johns Hopkins University, Baltimore, MD: M. Klag\*, R. Parekh\*, L Kao\*\*, L Mead\*\*, T Whitehead<sup>#</sup>, J Chester<sup>#</sup>.

National Institute of Diabetes and Digestive and Kidney Diseases (NIDDK), Phoenix, AZ: WC Knowler\*, RL Hanson\*\*, RG Nelson\*\*, A Malhotra\*\*, L Jones<sup>#</sup>, R Juan<sup>#</sup>, R Lovelace<sup>#</sup>, C Luethe<sup>#</sup>, LM Phillips<sup>#</sup>, J Sewemaenewa<sup>#</sup>, I Sili<sup>#</sup>, B Waseta<sup>#</sup>.

University of California, Los Angeles, CA: MF Saad\*, SB Nicholas\*, X Guo\*\*, J Rotter\*\*, K Taylor\*\*, M Budgett<sup>#</sup>, F Hariri<sup>#</sup>.

University of New Mexico, Albuquerque, NM: P Zager\*, V Shah\*\*, M Scavini<sup>#</sup>, A Bobelu<sup>#</sup>.

University of Texas Health Science Center at San Antonio, San Antonio, TX: H Abboud\*,  
N Arar\*\*, R Duggirala\*\*, BS Kasinath\*\*, R Plaetke\*\*, M Stern\*\*, C Jenkinson\*\*, C Goyes#, V  
Sartorio#, T Abboud#, L Hernandez#.

Wake-Forest University, Winston-Salem, NC: BI Freedman\* ‡, DW Bowden\*\*, SC Satko\*\*,  
SS Rich\*\*, S Warren#, S Viverette#, G Brooks#, R Young#, M Spainhour#.

Laboratory of Genomic Diversity, National Cancer Institute: Frederick MD: C Winkler\*, MW  
Smith\*\*, M Thompson#, R Hanson#, B Kessing#.

Wisconsin Fundus Photograph Reading Center: R Danis\*, M Davis (Director, Emeritus)

NIDDK Program Office: JP Briggs, PL Kimmel, R Rasooly.

NEI Intramural: EY Chew

External Advisory Committee: D Warnock (chair), R Chakraborty, GM Dunston, SJ O'Brien  
(ad hoc), R Spielman (deceased).

\*Principal Investigator

\*\*Co-investigator

#Program Coordinator

§University of California, Davis, CA

†University of California, Irvine, CA

‡Study Chair

**FinnDiane:** Supported by grants from the Folkhälsan Research Foundation, the Wilhelm and  
Else Stockmann Foundation, Liv och Hälsa Foundation, Helsinki University Central Hospital  
Research Funds (EVO), the Signe and Arne Gyllenberg Foundation, Finska Läkaresällskapet and



the European Commission. The research was also supported by the European Union's Seventh Framework Program (FP7/2007-2013) for the Innovative Medicine Initiative under grant agreement n° IMI/115006 (the SUMMIT consortium). We acknowledge the physicians, nurses and researchers at each center participating in the collection of patients: in the FinnDiane study group and at the Helsinki University Central Hospital, Department of Medicine, Division of Nephrology: C. Forsblom, A. Ahola, J. Fagerudd, M. Feodoroff, D. Gordin, V. Harjutsalo, O. Heikkilä, K. Hietala, J. Kytö, M. Lehto, S. Lindh, M. Parkkonen, K. Pettersson-Fernholm, M. Rosengård-Bärlund, M. Rönnback, A. Sandelin, A-R Salonen, L. Salovaara, M. Saraheimo, T. Soppela, A. Soro-Paavonen, P. Summanen, L. Thorn, N. Tolonen, J. Tuomikangas, T. Vesisenaho, J. Wadén;

Anjalankoski Health Centre: S. Koivula, T. Uggeldahl; Central Finland Central Hospital, Jyväskylä: T. Forslund, A. Halonen, A. Koistinen, P. Koskiaho, M. Laukkanen, J. Saltevo, M. Tiihonen; Central Hospital of Åland Islands, Mariehamn: M. Forsen, H. Granlund, A-C. Jonsson, B. Nyroos; Central Hospital of Kanta-Häme, Hämeenlinna: P. Kinnunen, A. Orvola, T. Salonen, A. Vähänen; Central Hospital of Länsi-Pohja, Kemi: H. Laukkanen, P. Nyländen, A. Sademies; Central Ostrabothnian Hospital District, Kokkola: S. Anderson, B. Asplund, U. Byskata, P. Liedes, M. Kuusela, T. Virkkala; City of Espoo Health Centre: (Espoonlahti): A. Nikkola, E. Ritola; (Tapiola): M. Niska, H. Saarinen; (Samaria): E. Oukko-Ruonen, T. Virtanen; (Viherlaakso): A. Lyytinen; City of Helsinki Health Centre: (Puistola): H. Kari, T. Simonen; (Suutarila): A. Kaprio, J. Kärkkäinen, B. Rantaeskola; (Töölö): P. Kääriäinen, J. Haaga, A-L. Pietiläinen; City of Hyvinkää Health Centre: S. Klemetti, T. Nyandoto, E. Rontu, S. Satuli-Autere; City of Vantaa Health Centre: (Korso): R. Toivonen, H. Virtanen; Länsimäki: R. Ahonen, M. Ivaska-Suomela, A. Jauhiainen; (Martinlaakso): M. Laine, T. Pellonpää, R. Puranen;

(Myyrmäki): A. Airas, J. Laakso, K. Rautavaara; (Rekola): M. Erola, E. Jatkola; (Tikkurila): R. Lönnblad, A. Malm, J. Mäkelä, E. Rautamo; Heinola Health Centre: P. Hentunen, J. Lagerstam; Herttoniemi Hospital, Helsinki: V. Sipilä; Hospital of Lounais-Häme, Forssa: T. Kalliomäki, J. Koskelainen, R. Nikkanen, N. Savolainen, H. Sulonen, E. Valtonen; Iisalmi Hospital: E. Toivanen; Jokilaakso Hospital, Jämsä: A. Parta, I. Pirttiniemi; Jorvi Hospital, Helsinki University Central Hospital: S. Aranko, S. Ervasti, R. Kauppinen-Mäkelin, A. Kuusisto, T. Leppälä, K. Nikkilä, L. Pekkonen; Jyväskylä Health Centre, Kyllö: K. Nuorva, M. Tiihonen; Kainuu Central Hospital, Kajaani: S. Jokelainen, P. Kemppainen, A-M. Mankinen, M. Sankari; Kerava Health Centre: H. Stuckey, P. Suominen; Kirkkonummi Health Centre: A. Lappalainen, M. Liimatainen, J. Santaholma; Kivelä Hospital, Helsinki: A. Aimolahti, E. Huovinen; Koskela Hospital, Helsinki: V. Ilkka, M. Lehtimäki; Kotka Health Centre: E. Pälikkö-Kontinen, A. Vanhanen; Kouvola Health Centre: E. Koskinen, T. Siitonen; Kuopio University Hospital: E. Huttunen, R. Ikäheimo, P. Karhapää, P. Kekäläinen, M. Laakso, T. Lakka, E. Lampainen, L. Moilanen, L. Niskanen, U. Tuovinen, I. Vauhkonen, E. Voutilainen; Kuusamo Health Centre: T. Kääriäinen, E. Isopoussu; Kuusankoski Hospital: E. Kilkki, I. Koskinen, L. Riihelä; Laakso Hospital, Helsinki: T. Meriläinen, P. Poukka, R. Savolainen, N. Uhlenius; Lahti City Hospital: A. Mäkelä, M. Tanner; Lapland Central Hospital, Rovaniemi: L. Hyvärinen, S. Severinkangas, T. Tulokas; Lappeenranta Health Centre: P. Linkola, I. Pulli; Lohja Hospital: T. Granlund, M. Saari, T. Salonen; Loimaa Health Centre: A. Mäkelä, P. Eloranta; Länsi-Uusimaa Hospital, Tammisaari: I-M. Jousmaa, J. Rinne; Malmi Hospital, Helsinki: H. Lanki, S. Moilanen, M. Tilly-Kiesi; Mikkeli Central Hospital: A. Gynther, R. Manninen, P. Nironen, M. Salminen, T. Vänttinen; Mänttä Regional Hospital: I. Pirttiniemi, A-M. Hänninen; North Karelian Hospital, Joensuu: U-M. Henttula, P. Kekäläinen, M. Pietarinen, A. Rissanen, M. Voutilainen; Nurmijärvi

Health Centre: A. Burgos, K. Urtamo; Oulaskangas Hospital, Oulainen: E. Jokelainen, P-L. Jylkkä, E. Kaarlela, J. Vuolaspuro; Oulu Health Centre: L. Hiltunen, R. Häkkinen, S. Keinänen-Kiukaanniemi; Oulu University Hospital: R. Ikäheimo; Päijät-Häme Central Hospital: H. Haapamäki, A. Helanterä, S. Hämäläinen, V. Ilvesmäki, H. Miettinen; Palokka Health Centre: P. Sopanen, L. Welling; Pieksämäki Hospital: V. Javtsenko, M. Tamminen; Pietarsaari Hospital: M-L. Holmbäck, B. Isomaa, L. Sarelin; Pori City Hospital: P. Ahonen, P. Merensalo, K. Sävelä; Porvoo Hospital: M. Kallio, B. Rask, S. Rämö; Raahe Hospital: A. Holma, M. Honkala, A. Tuomivaara, R. Vainionpää; Rauma Hospital: K. Laine, K. Saarinen, T. Salminen; Riihimäki Hospital: P. Aalto, E. Immonen, L. Juurinen; Salo Hospital: A. Alanko, J. Lapinleimu, P. Rautio, M. Virtanen; Satakunta Central Hospital, Pori: M. Asola, M. Juhola, P. Kunelius, M-L. Lahdenmäki, P. Pääkkönen, M. Rautavirta; Savonlinna Central Hospital: E. Korpi-Hyövälti, T. Latvala, E. Leijala; South Karelia Central Hospital, Lappeenranta: T. Ensala, E. Hussi, R. Härkönen, U. Nyholm, J. Toivanen; Tampere Health Centre: A. Vaden, P. Alarotu, E. Kujansuu, H. Kirkkopelto-Jokinen, M. Helin, S. Gummerus, L. Calonius, T. Niskanen, T. Kaitala, T. Vatanen; Tampere University Hospital: I. Ala-Houhala, T. Kuningas, P. Lampinen, M. Määttä, H. Oksala, T. Oksanen, K. Salonen, H. Tauriainen, S. Tulokas; Tiirismaa Health Centre, Hollola: T. Kivelä, L. Petlin, L. Savolainen; Turku Health Centre: I. Hämäläinen, H. Virtamo, M. Vähätalo; Turku University Central Hospital: K. Breitholz, R. Eskola, K. Metsärinne, U. Pietilä, P. Saarinen, R. Tuominen, S. Äyräpää; Vaajakoski Health Centre: K. Mäkinen, P. Sopanen; Valkeakoski Regional Hospital: S. Ojanen, E. Valtonen, H. Ylönen, M. Rautiainen, T. Immonen; Vammala Regional Hospital: I. Isomäki, R. Kroneld, M. Tapiolinna-Mäkelä; Vaasa Central Hospital: S. Bergkulla, U. Hautamäki, V-A. Myllyniemi, I. Rusk

**Go-DARTS:** We acknowledge the support of the Health Informatics Centre, University of Dundee for managing and supplying the anonymised data and National Health Service Tayside, the original data owner. The Wellcome Trust provides support for Wellcome Trust United Kingdom Type 2 Diabetes Case Control Collection (Go-DARTS) and informatics support is provided by the Chief Scientist Office. Go-DARTS genotyping analysed in this manuscript was specifically funded by the Wellcome Trust (084726/Z/08/Z, 085475/Z/08/Z, 085475/B/08/Z). CP and PHG are also supported by the European Union IMI SUMMIT programme on biomarkers for complications of diabetes.

## **Membership of Wellcome Trust Case Control Consortium 2**

### Management Committee

Peter Donnelly (Chair)<sup>1,2</sup>, Ines Barroso (Deputy Chair)<sup>3</sup>, Jenefer M Blackwell<sup>4,5</sup>, Elvira Bramon<sup>6</sup>, Matthew A Brown<sup>7</sup>, Juan P Casas<sup>8</sup>, Aiden Corvin<sup>9</sup>, Panos Deloukas<sup>3</sup>, Audrey Duncanson<sup>10</sup>, Janusz Jankowski<sup>11</sup>, Hugh S Markus<sup>12</sup>, Christopher G Mathew<sup>13</sup>, Colin NA Palmer<sup>14</sup>, Robert Plomin<sup>15</sup>, Anna Rautanen<sup>1</sup>, Stephen J Sawcer<sup>16</sup>, Richard C Trembath<sup>13</sup>, Ananth C Viswanathan<sup>17</sup>, Nicholas W Wood<sup>18</sup>

### Data and Analysis Group

Chris C A Spencer<sup>1</sup>, Gavin Band<sup>1</sup>, Céline Bellenguez<sup>1</sup>, Colin Freeman<sup>1</sup>, Garrett Hellenthal<sup>1</sup>, Eleni Giannoulatou<sup>1</sup>, Matti Pirinen<sup>1</sup>, Richard Pearson<sup>1</sup>, Amy Strange<sup>1</sup>, Zhan Su<sup>1</sup>, Damjan Vukcevic<sup>1</sup>, Peter Donnelly<sup>1,2</sup>

### DNA, Genotyping, Data QC and Informatics Group

Cordelia Langford<sup>3</sup>, Sarah E Hunt<sup>3</sup>, Sarah Edkins<sup>3</sup>, Rhian Gwilliam<sup>3</sup>, Hannah Blackburn<sup>3</sup>, Suzannah J Bumpstead<sup>3</sup>, Serge Dronov<sup>3</sup>, Matthew Gillman<sup>3</sup>, Emma Gray<sup>3</sup>, Naomi Hammond<sup>3</sup>, Alagurevathi Jayakumar<sup>3</sup>, Owen T McCann<sup>3</sup>, Jennifer Liddle<sup>3</sup>, Simon C Potter<sup>3</sup>, Radhi

Ravindrarajah<sup>3</sup>, Michelle Ricketts<sup>3</sup>, Matthew Waller<sup>3</sup>, Paul Weston<sup>3</sup>, Sara Widaa<sup>3</sup>, Pamela Whittaker<sup>3</sup>, Ines Barroso<sup>3</sup>, Panos Deloukas<sup>3</sup>.

Publications Committee

Christopher G Mathew (Chair)<sup>13</sup>, Jenefer M Blackwell<sup>4,5</sup>, Matthew A Brown<sup>7</sup>, Aiden Corvin<sup>9</sup>, Mark I McCarthy<sup>19</sup>, Chris C A Spencer<sup>1</sup>

1 Wellcome Trust Centre for Human Genetics, Roosevelt Drive, Oxford OX3 7LJ, UK; 2 Dept Statistics, University of Oxford, Oxford OX1 3TG, UK; 3 Wellcome Trust Sanger Institute, Wellcome Trust Genome Campus, Hinxton, Cambridge CB10 1SA, UK; 4 Telethon Institute for Child Health Research, Centre for Child Health Research, University of Western Australia, 100 Roberts Road, Subiaco, Western Australia 6008; 5 Cambridge Institute for Medical Research, University of Cambridge School of Clinical Medicine, Cambridge CB2 0XY, UK; 6 Department of Psychosis Studies, NIHR Biomedical Research Centre for Mental Health at the Institute of Psychiatry, King's College London and The South London and Maudsley NHS Foundation Trust, Denmark Hill, London SE5 8AF, UK; 7 Diamantina Institute of Cancer, Immunology and Metabolic Medicine, Princess Alexandra Hospital, University of Queensland, Brisbane, Queensland, Australia; 8 Dept Epidemiology and Population Health, London School of Hygiene and Tropical Medicine, London WC1E 7HT and Dept Epidemiology and Public Health, University College London WC1E 6BT, UK; 9 Neuropsychiatric Genetics Research Group, Institute of Molecular Medicine, Trinity College Dublin, Dublin 2, Eire; 10 Molecular and Physiological Sciences, The Wellcome Trust, London NW1 2BE; 11 Centre for Digestive Diseases, Queen Mary University of London, London E1 2AD, UK and Digestive Diseases Centre, Leicester Royal Infirmary, Leicester LE7 7HH, UK and Department of Clinical

Pharmacology, Old Road Campus, University of Oxford, Oxford OX3 7DQ, UK; 12 Clinical Neurosciences, St George's University of London, London SW17 0RE; 13 King's College London Dept Medical and Molecular Genetics, School of Medicine, Guy's Hospital, London SE1 9RT, UK; 14 Biomedical Research Centre, Ninewells Hospital and Medical School, Dundee DD1 9SY, UK; 15 King's College London Social, Genetic and Developmental Psychiatry Centre, Institute of Psychiatry, Denmark Hill, London SE5 8AF, UK; 16 University of Cambridge Dept Clinical Neurosciences, Addenbrooke's Hospital, Cambridge CB2 0QQ, UK; 17 NIHR Biomedical Research Centre for Ophthalmology, Moorfields Eye Hospital NHS Foundation Trust and UCL Institute of Ophthalmology, London EC1V 2PD, UK; 18 Dept Molecular Neuroscience, Institute of Neurology, Queen Square, London WC1N 3BG, UK; 19

**University of Lublin/National Eye Institute:** Supported by the National Eye Institute intramural program.

#### References

1. Keating BJ, Tischfield S, Murray SS, et al. Concept, design and implementation of a cardiovascular gene-centric 50 k SNP array for large-scale genomic association studies. *PLoS One* 2008;3:e3583.
2. Purcell S, Neale B, Todd-Brown K, et al. PLINK: a tool set for whole-genome association and population-based linkage analyses. *Am J Hum Genet* 2007;81:559-75.
3. Zhou K, Bellenguez C, Spencer CC, et al. Common variants near ATM are associated with glycemic response to metformin in type 2 diabetes. *Nat Genet* 2011;43:117-20.
